# Supplementary material for: Trends in Cause-Specific Outcomes Among Individuals With Type 2 Diabetes and Heart Failure in the United Kingdom, 1998-2017
Source: PubMed Central journal article supplement (PMC6902744; doi:10.1001/jamanetworkopen.2019.16447), 2019-12-02
Supplement: jamanetwopen-2-e1916447-s001.pdf [file jamanetwopen-2-e1916447-s001.pdf]

## Supplementary Online Content

Lawson CA, Zaccardi F, McCann GP, Davies MJ, Kadam UT, Khunti K. Trends in cause-specific outcomes among individuals with type 2 diabetes and heart failure in the United Kingdom, 1998-2017. *JAMA Netw Open*. 2019;2(12):e1916447. doi:10.1001/jamanetworkopen.2019.16447

**eFigure 1.** Flow Chart of the Patient Selection Process

**eFigure 2.** Algorithm for Categorizing People With Type 1 and Type 2 Diabetes

**eFigure 3.** Cumulative Incidence by Cause of Death

**eFigure 4.** Trends in Risk Factors

**eFigure 5.** Trends in Comorbidities at HF Diagnosis by Diabetes Status

**eTable 1.** Heart Failure Selection CPRD Code Set

**eTable 2.** Heart Failure Selection *ICD-10* Code Set

**eTable 3.** Glucose-Lowering Medications

**eTable 4.** Missing Data

**eTable 5.** Patient Characteristics at Diagnosis of Heart Failure by Diabetes Status

**eTable 6.** Predicted Rates of Death During the First and Subsequent Years Following HF Diagnosis, by Type 2 Diabetes Status and Calendar Year

**eTable 7.** Age-Standardized Predicted Mortality Risk by Calendar Time

**eTable 8.** Associations With Hospital Admission and Death in Complete Case Analysis

This supplementary material has been provided by the authors to give readers additional information about their work.

**eFigure 1.** Flow Chart of the Patient Selection Process

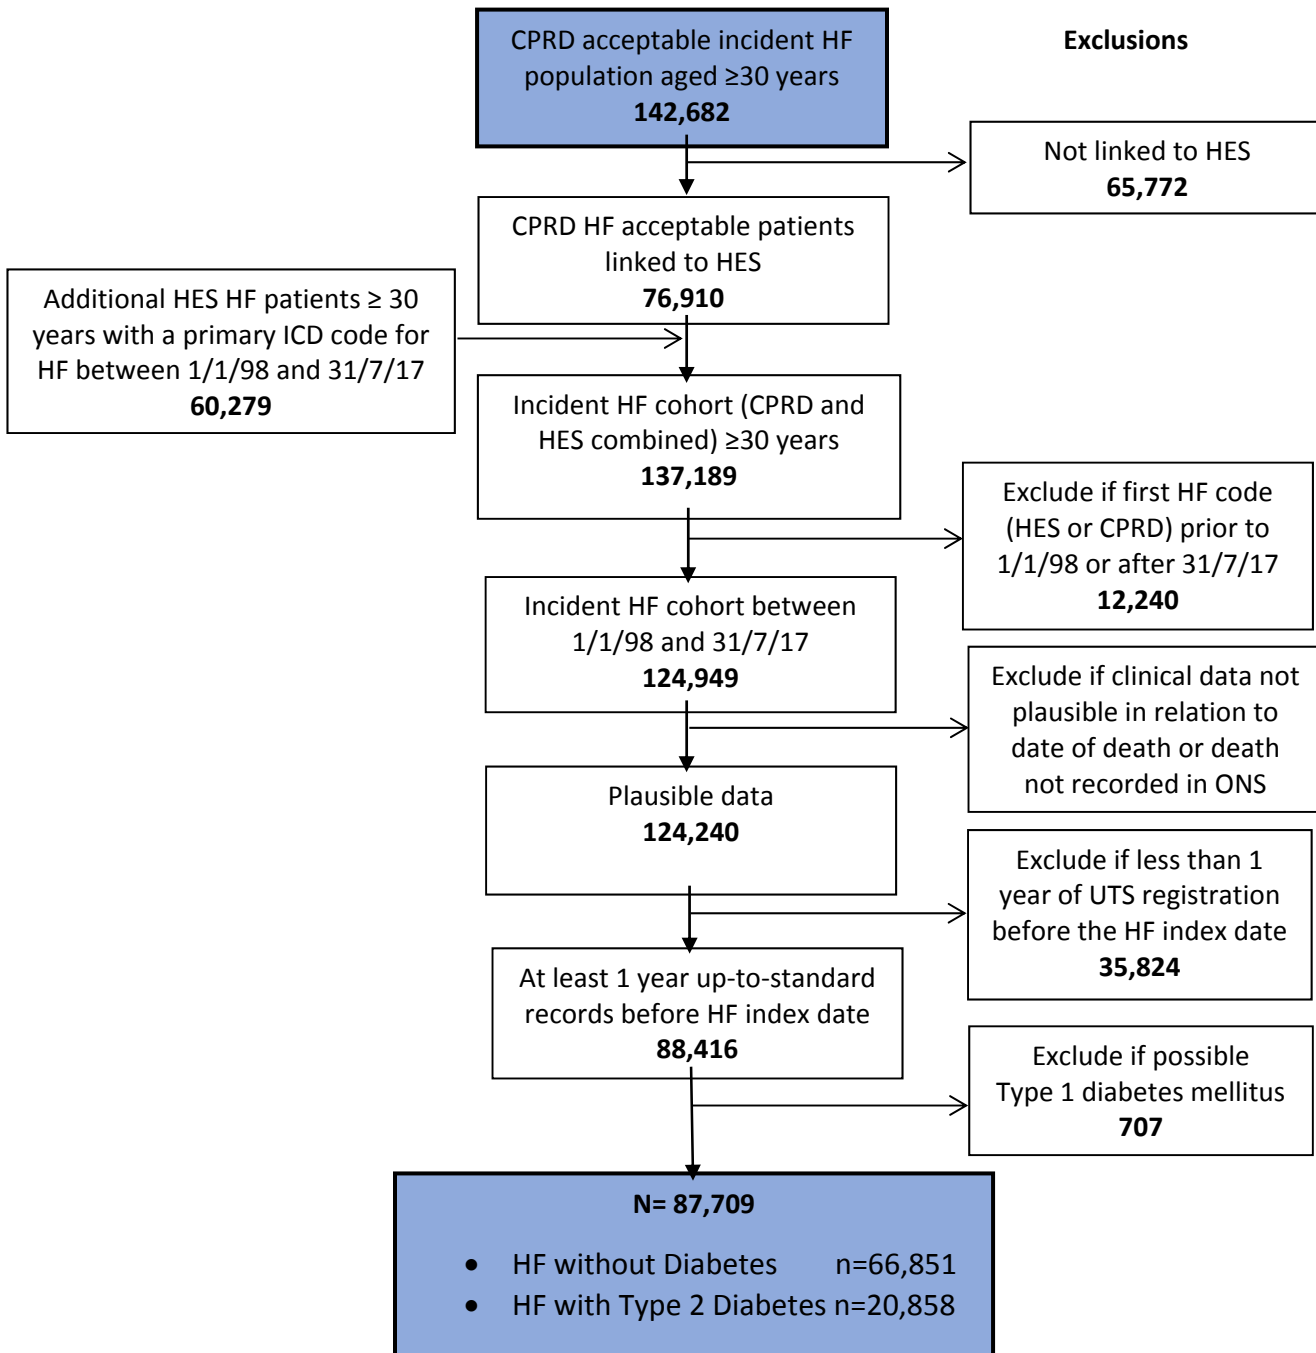

**HES:** Hospital Episode Statistics; **HF:** Heart Failure; **UTS:** Up to standard.

eFigure 2. Algorithm for Categorizing People With Type 1 and Type 2 Diabetes

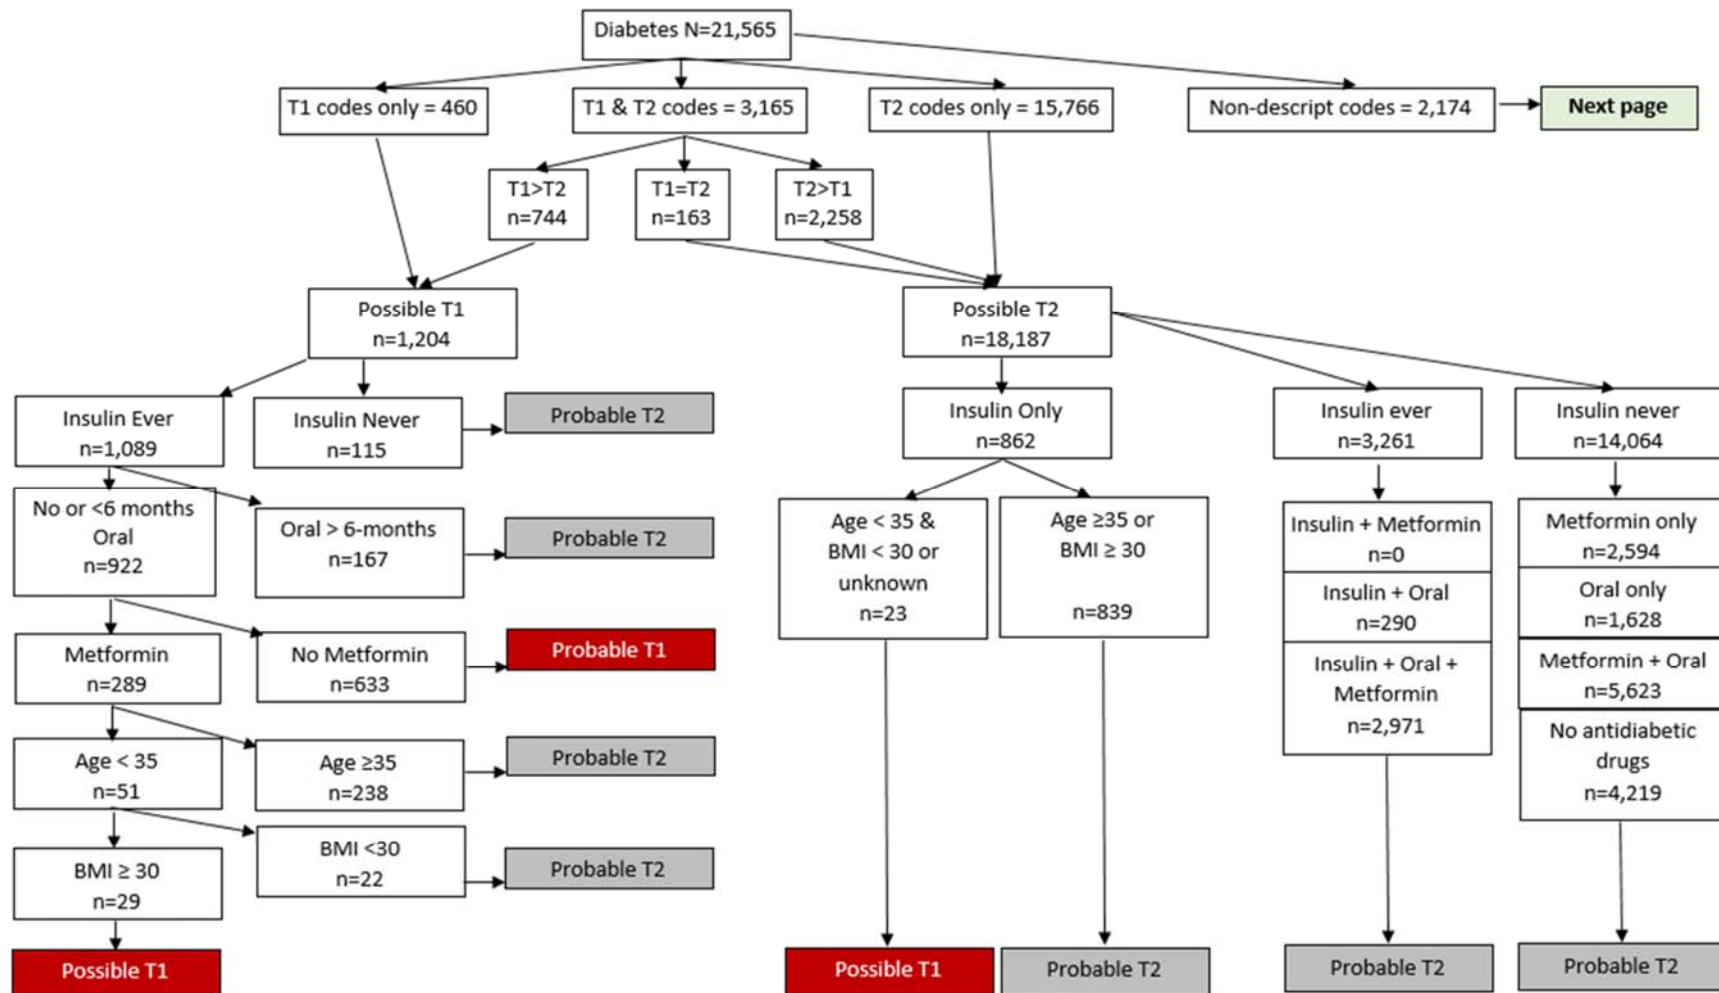

**eFigure 2.** Algorithm for Categorizing People With Type 1 and Type 2 Diabetes (cont.)

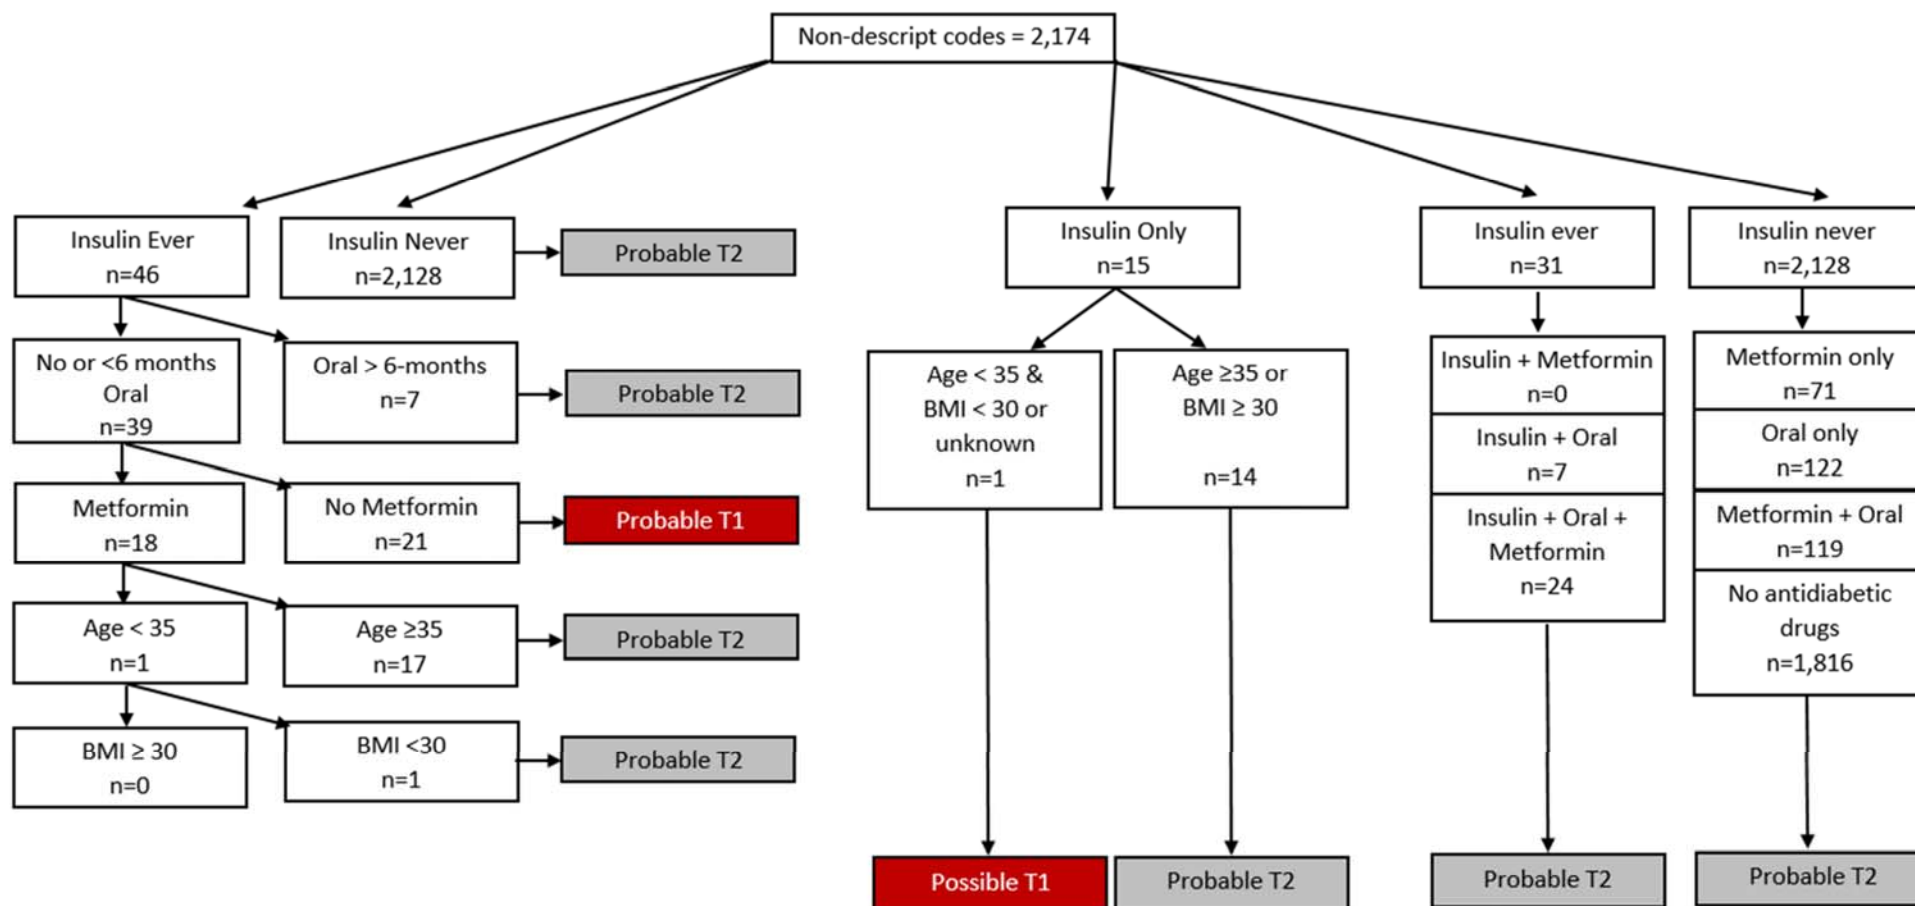

Algorithm for categorising Type 1 and Type 2 Diabetes.\* Drugs were identified using at least one prescription preceding the heart failure diagnosis date. Categories are mutually exclusive. Non-descript codes were labelled ‘diabetes’ without specifying Type 1 or 2. These codes were subjected to the type 1 and type 2 algorithms. If they were found to be potential type 1 patients using either algorithm they were excluded. \*Algorithm taken from de Lusignan S, Khunti K, Belsey J, Hattersley A, van Vlymen J, Gallagher H, et al. A method of identifying and correcting miscoding, misclassification and misdiagnosis in diabetes: a pilot and validation study of routinely collected data. *Diabet Med.* 2010 Feb;27(2):203-9.

**eFigure 3.** Cumulative Incidence by Cause of Death

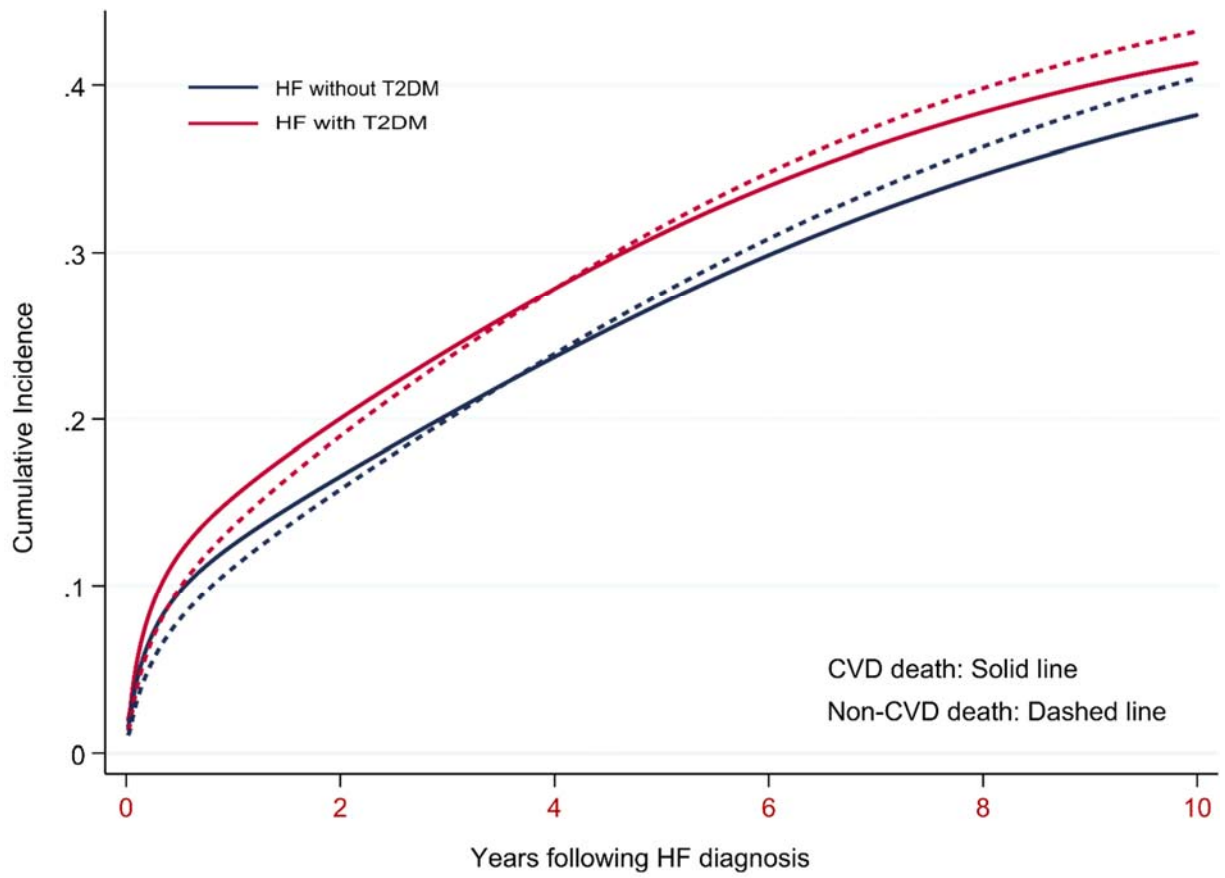

Cumulative incidence curves predicted at mean population age (78 years) at mid calendar time (2007).

**eFigure 4. Trends in Risk Factors**

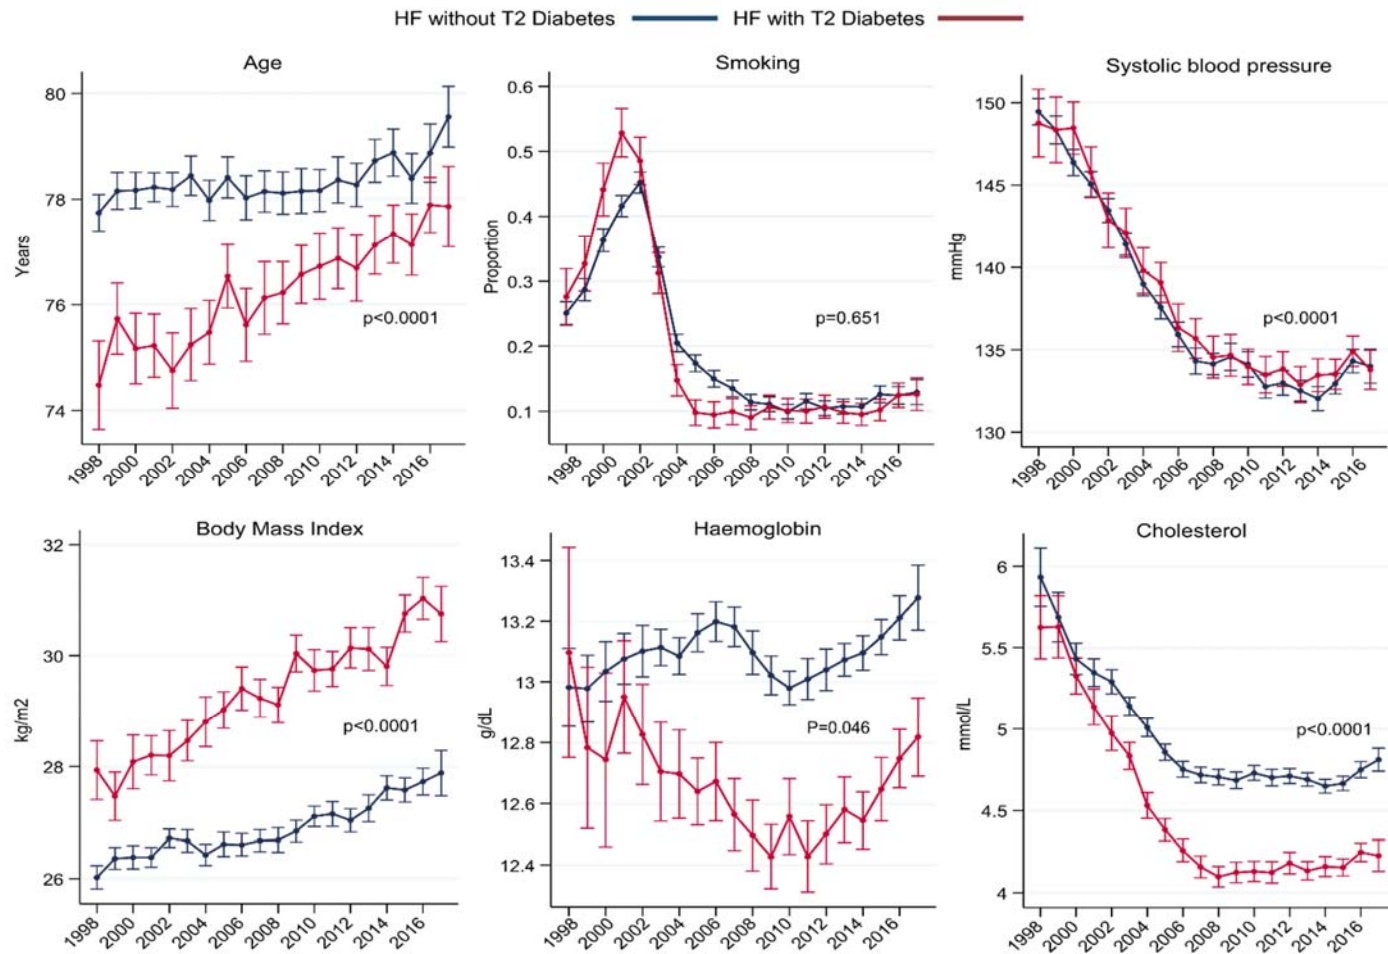

Estimated age-adjusted cardiovascular risk factors in patients with new heart failure by T2DM status and calendar year of HF diagnosis. Spikes indicate 95% CI. P-values test the difference in trends.

**eFigure 5. Trends in Comorbidities at HF Diagnosis by Diabetes Status**

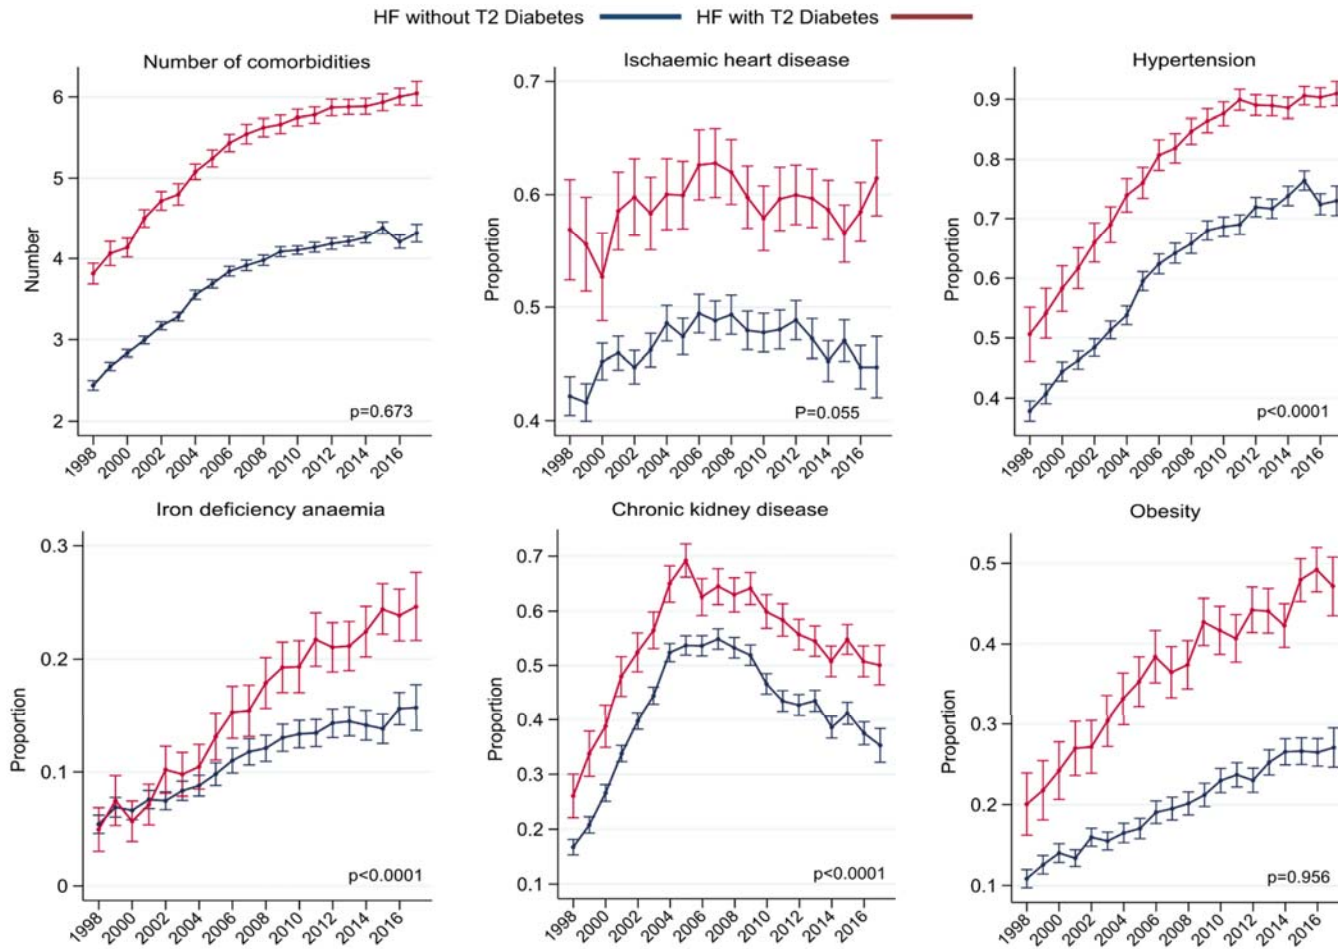

Estimated age-adjusted prevalence of comorbidities in patients with new heart failure by T2DM status and calendar year of HF diagnosis. Spikes indicate 95% CI. P-values test the difference in trends

**eTable 1. Heart Failure Selection CPRD Code Set**

| <b>Medcode</b> | <b>Read code</b> | <b>Read term</b>                                            |
|----------------|------------------|-------------------------------------------------------------|
| 2062           | G58..00          | Heart failure                                               |
| 1223           | G58..11          | Cardiac failure                                             |
| 398            | G580.00          | Congestive heart failure                                    |
| 2906           | G580.11          | Congestive cardiac failure                                  |
| 10079          | G580.12          | Right heart failure                                         |
| 10154          | G580.13          | Right ventricular failure                                   |
| 9524           | G580.14          | Biventricular failure                                       |
| 23707          | G580000          | Acute congestive heart failure                              |
| 32671          | G580100          | Chronic congestive heart failure                            |
| 27884          | G580200          | Decompensated cardiac failure                               |
| 11424          | G580300          | Compensated cardiac failure                                 |
| 94870          | G580400          | Congestive heart failure due to valvular disease            |
| 884            | G581.00          | Left ventricular failure                                    |
| 23481          | G581.11          | Asthma - cardiac                                            |
| 43618          | G581.12          | Pulmonary oedema - acute                                    |
| 5942           | G581.13          | Impaired left ventricular function                          |
| 5255           | G581000          | Acute left ventricular failure                              |
| 27964          | G582.00          | Acute heart failure                                         |
| 101138         | G583.00          | Heart failure with normal ejection fraction                 |
| 101137         | G583.11          | HFNEF - heart failure with normal ejection fraction         |
| 106897         | G583.12          | Heart failure with preserved ejection fraction              |
| 104275         | G584.00          | Right ventricular failure                                   |
| 4024           | G58z.00          | Heart failure NOS                                           |
| 12590          | G58z.11          | Weak heart                                                  |
| 17278          | G58z.12          | Cardiac failure NOS                                         |
| 9913           | I01..00          | Heart failure confirmed                                     |
| 22262          | G1yz100          | Rheumatic left ventricular failure                          |
| 21837          | G232.00          | Hypertensive heart&renal dis wth (congestive) heart failure |



**eTable 2. Heart Failure Selection ICD-10 Code Set**

| <b>ICD-10 Code</b> | <b>ICD-10 term</b>                                                                          |
|--------------------|---------------------------------------------------------------------------------------------|
| I50                | Heart failure                                                                               |
| I50.0              | Congestive heart failure                                                                    |
| I50.1              | Left ventricular failure                                                                    |
| I50.9              | Heart failure, unspecified                                                                  |
| I11.0              | Hypertensive heart disease with (congestive) heart failure                                  |
| I13.2              | Hypertensive heart and renal disease with both (congestive) heart failure and renal failure |
| I13.0              | Hypertensive heart and renal disease with (congestive) heart failure                        |

| <b>eTable 3. Glucose-Lowering Medications</b> |                   |
|-----------------------------------------------|-------------------|
| <b>Medication</b>                             | <b>Number (%)</b> |
| None                                          | 8,514 (40.8)      |
| Metformin                                     | 7,637 (36.6)      |
| Sulphonylureas                                | 6,021 (28.9)      |
| Thiazolidinediones                            | 1,168 (5.6)       |
| Incretins                                     | 656 (3.2)         |
| Other oral medications                        | 232 (1.1)         |
| Insulin                                       | 3,606 (17.3)      |
| <b>Summary categories</b>                     |                   |
| None                                          | 8,514 (40.8)      |
| Oral                                          | 8,738 (10.0)      |
| Oral and Insulin                              | 1,838 (2.1)       |
| Insulin only                                  | 1,768 (2.0)       |

| <b>eTable 4. Missing Data</b> |                        |
|-------------------------------|------------------------|
| <b>Characteristics</b>        | <b>No. Missing (%)</b> |
| Age                           | -                      |
| Gender                        | -                      |
| Socioeconomic status          | 0.2                    |
| Ethnicity                     | 7.8                    |
| Prescribed drugs              | 0                      |
| Comorbidities                 | 0                      |
| Smoking                       | 5.9                    |
| Alcohol                       | 14.1                   |
| BMI (kg/m <sup>2</sup> )      | 14.8                   |
| Systolic BP (mm/Hg)           | 2.6                    |
| Total cholesterol (mmol/L)    | 32.9                   |
| Haemoglobin (g/dL)            | 24.6                   |
| eGFR (ml/min/m <sup>2</sup> ) | 23.4                   |

**BMI**, body mass index; **BP**, blood pressure;

**eGFR**, estimated glomerular filtration rate

**eTable 5.** Patient Characteristics at Diagnosis of Heart Failure by Diabetes Status<sup>a</sup>

| Characteristic          | No. (%)                  |                              |
|-------------------------|--------------------------|------------------------------|
|                         | No Diabetes (n = 66 851) | Type 2 Diabetes (m = 20 858) |
| Age, median (IQR), y    | 80.0 (72.0-86.0)         | 78.0 (70.0-84.0)             |
| Women                   | 33 768 (50.5)            | 9405 (45.1)                  |
| Race/ethnicity          |                          |                              |
| White                   | 59 577 (91.9)            | 18 634 (90.4)                |
| South Asian             | 597 (0.9)                | 712 (3.5)                    |
| Black                   | 360 (0.6)                | 310 (1.5)                    |
| Other <sup>b</sup>      | 465 (0.7)                | 245 (1.2)                    |
| Socioeconomic status    |                          |                              |
| Most affluent quintile  | 13 042 (19.5)            | 3315 (15.9)                  |
| Most deprived quintile  | 10 659 (16.0)            | 4086 (19.6)                  |
| Hospital diagnosis      | 25 525 (38.2)            | 10 569 (50.7)                |
| Prescribed drug therapy |                          |                              |
| β-blocker               | 19 134 (28.6)            | 7287 (34.9)                  |
| ACE inhibitor           | 23 374 (35.0)            | 9358 (44.9)                  |
| ARB                     | 5927 (8.9)               | 3142 (15.1)                  |
| AA                      | 4036 (6.0)               | 1682 (8.1)                   |
| Aspirin                 | 24 266 (36.3)            | 9288 (44.5)                  |
| Loop diuretic           | 32 111 (48.0)            | 10 821 (51.9)                |
| Comorbidities           |                          |                              |
| No., mean (SD)          | 3.7 (1.9)                | 5.4 (1.9)                    |
| IHD                     | 31 167 (46.6)            | 12 370 (59.3)                |
| MI                      | 16 273 (24.3)            | 6924 (33.2)                  |
| AF                      | 26 409 (39.5)            | 8321 (39.9)                  |
| Hypertension            | 39 629 (59.3)            | 16 774 (80.4)                |
| Stroke                  | 7378 (11.0)              | 3207 (15.4)                  |
| Anemia                  | 7550 (11.3)              | 3539 (17.0)                  |
| Obesity                 | 13 374 (20.0)            | 8622 (41.3)                  |
| CKD                     | 26 881 (55.2)            | 10 638 (57.4)                |
| COPD                    | 12 091 (18.1)            | 4266 (20.5)                  |

|                                        |                     |                     |
|----------------------------------------|---------------------|---------------------|
| Asthma                                 | 11 945 (17.9)       | 4451 (21.3)         |
| Depression                             | 14 582 (21.8)       | 5291 (25.4)         |
| Osteoarthritis                         | 24 351 (36.4)       | 8079 (38.7)         |
| Cancer                                 | 15 648 (23.4)       | 4751 (22.8)         |
| Dementia                               | 3073 (4.6)          | 896 (4.3)           |
| Active smoking status                  | 13 382 (21.5)       | 3822 (18.7)         |
| Active alcohol use                     | 41 181 (73.2)       | 12 220 (63.9)       |
| BMI, median (IQR)                      | 26.2 (23.1-29.8)    | 29.0 (25.3-33.6)    |
| Systolic BP, mean (SD), mm Hg          | 138.2 (21.9)        | 136.9 (20.9)        |
| Total cholesterol, median (IQR), mg/dL | 181.5 (154.4-216.2) | 162.2 (135.1-193.1) |
| Hemoglobin, mean (SD), g/dL            | 13.1 (1.9)          | 12.7 (1.9)          |
| eGFR, mean (SD), ml/min/m <sup>2</sup> | 57.9 (20.4)         | 56.6 (21.9)         |

Abbreviations: AA, aldosterone antagonist; ACE, angiotensin-converting enzyme; AF, atrial fibrillation; ARB, angiotensin receptor blocker; BMI, body mass index (calculated as weight in kilograms divided by height in meters squared); BP, blood pressure; CKD, chronic kidney disease; COPD, chronic obstructive pulmonary disease; eGFR, estimated glomerular filtration rate, HF, heart failure; IHD, ischemic heart disease; IQR, interquartile range; MI, myocardial infarction.

SI conversion factors: To convert total cholesterol to mmol/L, multiply by 0.0259; and hemoglobin to g/L, multiply by 10.0.

<sup>a</sup>Except for AF, cancer, and dementia, all differences were significant (ie,  $P < .001$ ).

<sup>b</sup>Includes patients coded as mixed race, other race/ethnicity, or unknown.

| <b>eTable 6. Predicted Rates of Death During the First and Subsequent Years Following HF Diagnosis, by Type 2 Diabetes Status and Calendar Year</b>                                                                                                                                                                                                                                                                                                                                                                                                                                                                         |                          |                                                 |                       |                    |                               |                                                                                                           |                |                   |
|-----------------------------------------------------------------------------------------------------------------------------------------------------------------------------------------------------------------------------------------------------------------------------------------------------------------------------------------------------------------------------------------------------------------------------------------------------------------------------------------------------------------------------------------------------------------------------------------------------------------------------|--------------------------|-------------------------------------------------|-----------------------|--------------------|-------------------------------|-----------------------------------------------------------------------------------------------------------|----------------|-------------------|
|                                                                                                                                                                                                                                                                                                                                                                                                                                                                                                                                                                                                                             | Deaths<br>in first month | Predicted rate<br>per 100 person-years (95% CI) |                       |                    | P<br>Interaction <sup>a</sup> | Annual average percent change in rates (95% CI) and any<br>significant change in trend slope <sup>b</sup> |                |                   |
|                                                                                                                                                                                                                                                                                                                                                                                                                                                                                                                                                                                                                             | N(%)                     | Overall                                         | 1998-2001             | 2014-2017          |                               |                                                                                                           | Year of change |                   |
| <b>Rates during the first year following heart failure diagnosis in those who survived the first month</b>                                                                                                                                                                                                                                                                                                                                                                                                                                                                                                                  |                          |                                                 |                       |                    |                               |                                                                                                           |                |                   |
| HF without<br>diabetes                                                                                                                                                                                                                                                                                                                                                                                                                                                                                                                                                                                                      | 8,882 (13.3)             | 22.4 (21.7, 23.1)                               | 22.9 (21.8 -<br>24.0) | 21.0 (19.9 - 22.1) |                               | -0.7 (-1.2, -0.2)                                                                                         | N/A            | -0.7 (-1.2, -0.2) |
| HF with T2DM                                                                                                                                                                                                                                                                                                                                                                                                                                                                                                                                                                                                                | 2,629 (12.6)             | 28.5 (27.5, 30.0)                               | 32.3 (29.0 -<br>35.6) | 26.8 (24.9 - 28.7) | <0.0001                       | -1.4 (-1.8, -0.9)                                                                                         | N/A            | -1.4 (-1.8, -0.9) |
| <b>Rates after the first year following heart failure diagnosis in survivors of the first year</b>                                                                                                                                                                                                                                                                                                                                                                                                                                                                                                                          |                          |                                                 |                       |                    |                               |                                                                                                           |                |                   |
|                                                                                                                                                                                                                                                                                                                                                                                                                                                                                                                                                                                                                             | Deaths<br>in first year  | Predicted rate<br>per 100 person-years (95% CI) |                       |                    | P<br>Interaction <sup>c</sup> | Slope change<br>Annual percent change before and after break (95% CI) <sup>e</sup>                        |                |                   |
|                                                                                                                                                                                                                                                                                                                                                                                                                                                                                                                                                                                                                             |                          | Overall                                         | 1998-2001             | 2014-2017          |                               |                                                                                                           |                |                   |
| HF without<br>diabetes                                                                                                                                                                                                                                                                                                                                                                                                                                                                                                                                                                                                      | 20,229 (30.3)            | 14.9 (14.7, 15.1)                               | 16.7 (16.4 -<br>17.1) | 13.5 (13.0 - 14.1) |                               | -1.6 (-1.8, -1.4)                                                                                         | N/A            | -1.6 (-1.8, -1.4) |
| HF with T2DM                                                                                                                                                                                                                                                                                                                                                                                                                                                                                                                                                                                                                | 6,458 (31.0)             | 20.3 (19.1, 20.7)                               | 23.8 (22.7 -<br>24.9) | 17.3 (16.4 - 18.3) | 0.013                         | -2.3 (-2.7, -1.9)                                                                                         | N/A            | -2.3 (-2.7, -1.9) |
| <p><b>HF</b>, heart failure; <b>T2DM</b>, type 2 diabetes mellitus; <b>CI</b>, confidence interval</p> <p>a P value for the difference in trend lines between groups. Estimated by fitting an interaction term between calendar year as a continuous variable and T2DM status in the negative binomial models also containing age.</p> <p>b Average annual percentage change in rates (per 100 person years) for each increasing year of diagnosis. Any significant change in the trend line for rates was estimated using Joinpoint regression. Where present, rates are reported before and after the year of change.</p> |                          |                                                 |                       |                    |                               |                                                                                                           |                |                   |

| <b>eTable 7. Age-Standardized Predicted Mortality Risk by Calendar Time</b> |                   |                  |                  |                   |                  |                  |                   |                  |                  |
|-----------------------------------------------------------------------------|-------------------|------------------|------------------|-------------------|------------------|------------------|-------------------|------------------|------------------|
| Group                                                                       | 1-year            |                  |                  | 3-year            |                  |                  | 5-year            |                  |                  |
|                                                                             | Overall           | 1998-2001        | 2012-2015        | Overall           | 1998-2001        | 2012-2015        | Overall           | 1998-2001        | 2012-2015        |
| HF without diabetes                                                         | 29.2 (29.0, 29.5) | 30.9 (30.5,31.4) | 27.0 (26.5,27.5) | 46.7 (46.3, 47.0) | 48.8 (48.3,49.4) | 43.7 (43.1,44.4) | 59.2 (58.9, 59.6) | 61.5 (60.9,62.0) | 56.1 (55.4,56.8) |
| HF with T2DM                                                                | 35.6 (35.1, 36.1) | 37.5 (36.8,38.1) | 33.0 (32.4,33.6) | 54.6 (54.0, 55.1) | 56.8 (56.0,57.5) | 51.4 (50.7,52.2) | 67.2 (66.7, 67.7) | 69.3 (68.6,70.0) | 64.1 (63.3,64.9) |

**T2DM**; type 2 diabetes. Overall rates were also standardised for calendar year.

**eTable 8. Associations With Hospital Admission and Death in Complete Case Analysis**

|                                              | <b>All</b>        | <b>CVD</b>        | <b>Non-CVD</b>    |
|----------------------------------------------|-------------------|-------------------|-------------------|
| <b>Group</b>                                 | Adjusted          | Adjusted          | Adjusted          |
| <b>Hospital Admissions (IRR with 95% CI)</b> |                   |                   |                   |
| HF without diabetes (ref)                    | 1.0               | 1.0               | 1.0               |
| HF with type 2 diabetes                      | 1.25 (1.23, 1.27) | 1.21 (1.17, 1.25) | 1.27 (1.24, 1.30) |
| <b>Death (HR with 95% CI)</b>                |                   |                   |                   |
| HF without diabetes (ref)                    | 1.0               | 1.0               | 1.0               |
| HF with type 2 diabetes                      | 1.14 (1.10, 1.18) | 1.08 (1.03, 1.13) | 1.21 (1.15, 1.28) |

**CVD**; Cardiovascular, **IRR**; Incidence rate ratio, **CI**; Confidence interval, **HR**; Hazard ratio  
 Adjustment included age, gender, socioeconomic status, ethnicity, place of diagnosis, calendar year, beta-blocker, angiotensin converting enzyme inhibitor, angiotensin receptor blocker, aldosterone antagonist, aspirin, loop diuretic, number of comorbidities, ischaemic heart disease, myocardial infarction, atrial fibrillation, hypertension, stroke, anaemia, obesity, chronic kidney disease, chronic obstructive pulmonary disease, asthma, depression, osteoarthritis, cancer and dementia, current smoking, current alcohol drinker, body mass index, systolic blood pressure, cholesterol, haemoglobin and estimated glomerular filtration rate.
